# Supplementary material for: A quantum chemical assessment on the sensing ability of porphyrins and phthalocyanines towards volatile organic compounds using density functional theory investigations
Source: Royal Society of Chemistry journal article supplement (doi:10.1039/d3me00175j), 2023-12-06
Supplement: d3me00175j1.pdf [file d3me00175j1.pdf]

**Supporting information**

**A quantum chemical assessment on the sensing ability of porphyrins and phthalocyanines towards volatile organic compounds using density functional theory investigations**

**Rence P Reji<sup>a</sup>, Yuvaraj Sivalingam<sup>b</sup>, Yoshiyuki Kawazoe<sup>c,d,e</sup> and Surya Velappa Jayaraman<sup>a,c\*</sup>**

*<sup>a</sup>Novel, Advanced, and Applied Materials (NAAM) laboratory, Department of Physics and Nanotechnology, SRM Institute of Science and Technology, Kattankulathur, Tamil Nadu, India*

*<sup>b</sup>Laboratory of Sensors, Energy, and Electronic devices (Lab SEED), Department of Physics and Nanotechnology, SRM Institute of Science and Technology, Kattankulathur, Tamil Nadu, India*

*<sup>c</sup>New Industry Creation Hatchery Center, Tohoku University, Aoba-Ku, Miyagi, Sendai 980-8579, Japan*

*<sup>d</sup>Department of Physics and Nanotechnology, SRM Institute of Science and Technology, Kattankulathur 603203, Tamil Nadu, India*

*<sup>e</sup>Department of Physics, Suranaree University of Technology, Nakhon Ratchasima, Thailand.*

\*Corresponding author E-mail: [suryaj@srmist.edu.in](mailto:suryaj@srmist.edu.in)

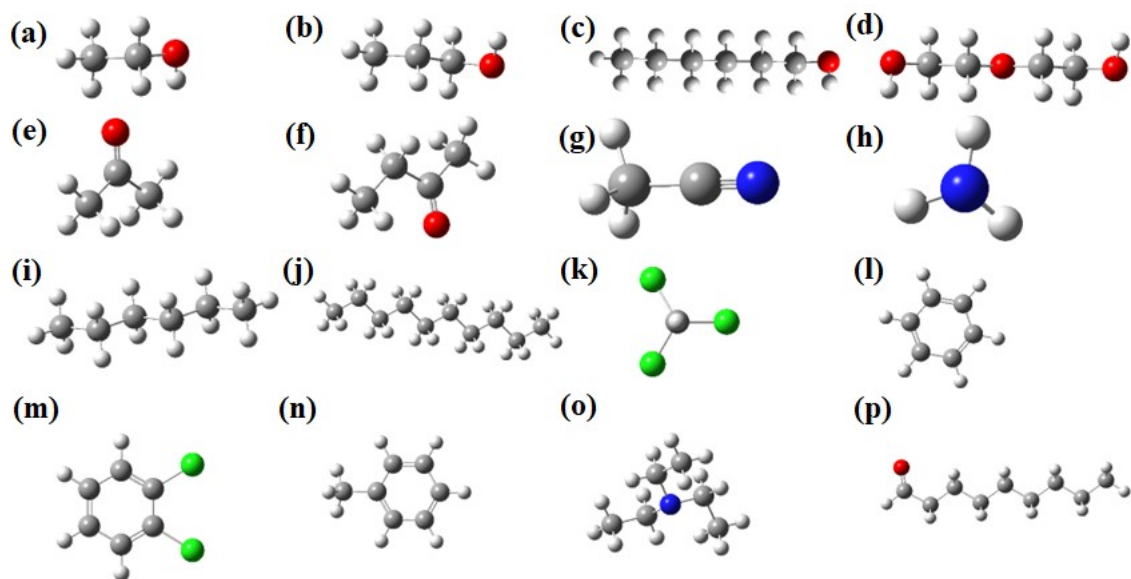

**Fig S1.** Optimised structures of VOCs: **(a)** Ethanol, **(b)** 1-propanol, **(c)** 1-hexanol, **(d)** Diethyl glycol, **(e)** Acetone, **(f)** Ethylmethyl ketone, **(g)** Acetonitrile, **(h)** Ammonia, **(i)** n-hexane, **(j)** n-decane, **(k)** Chloroform, **(l)** Benzene, **(m)** 1,2-dichloro benzene, **(n)** Toluene, **(o)** TEA, **(p)** Nonanal.

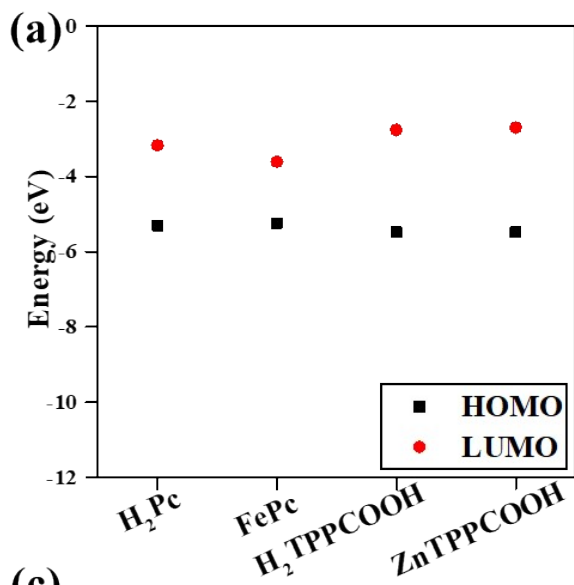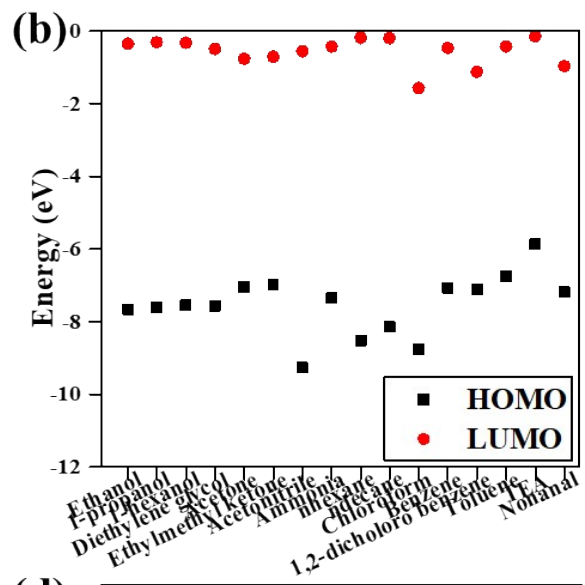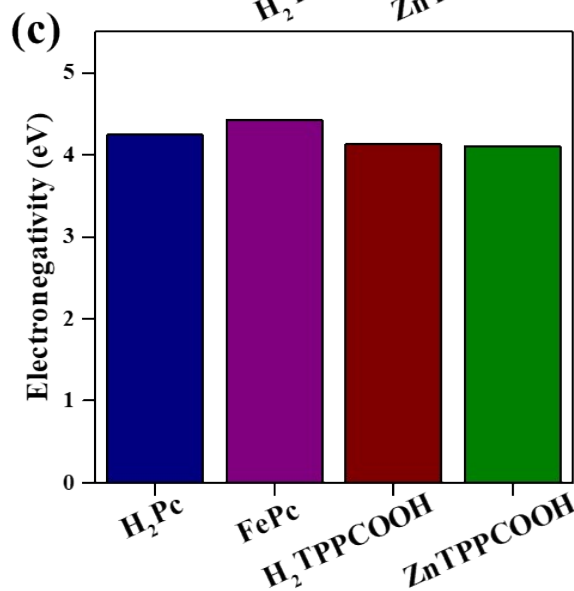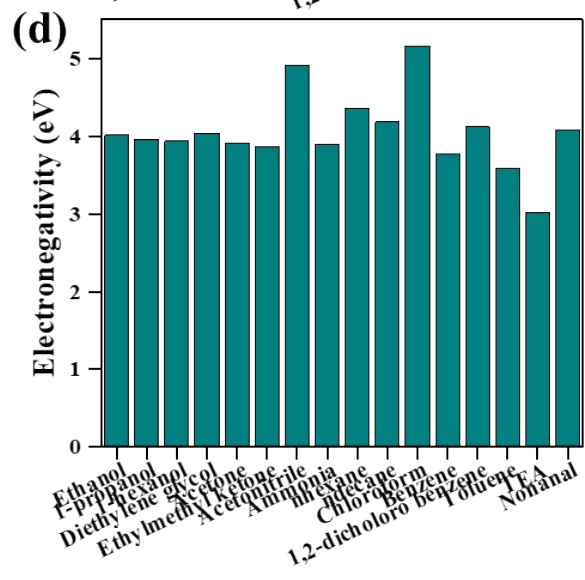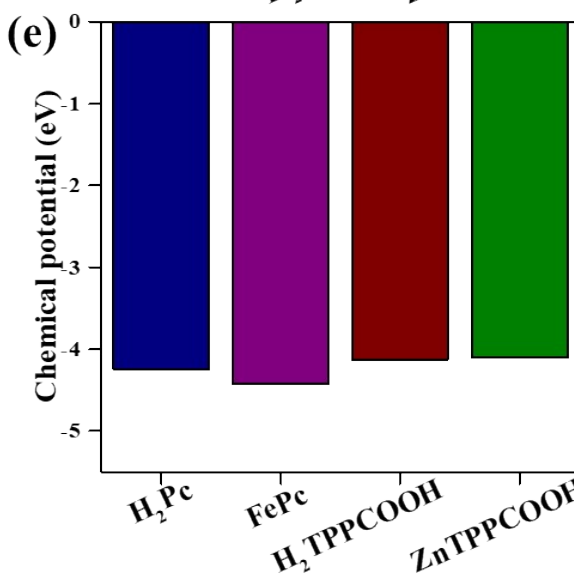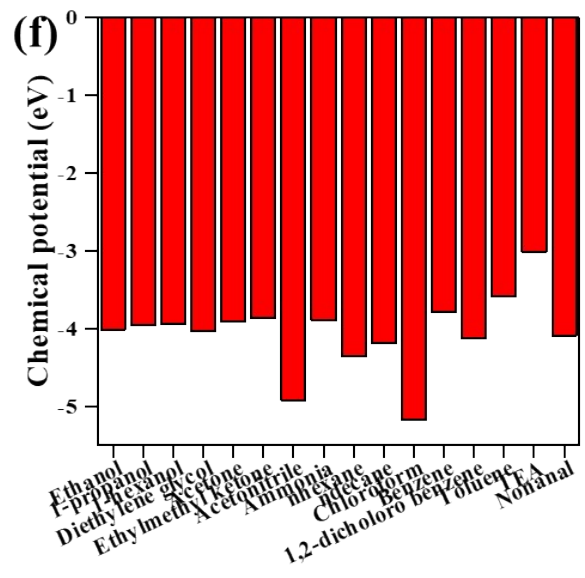

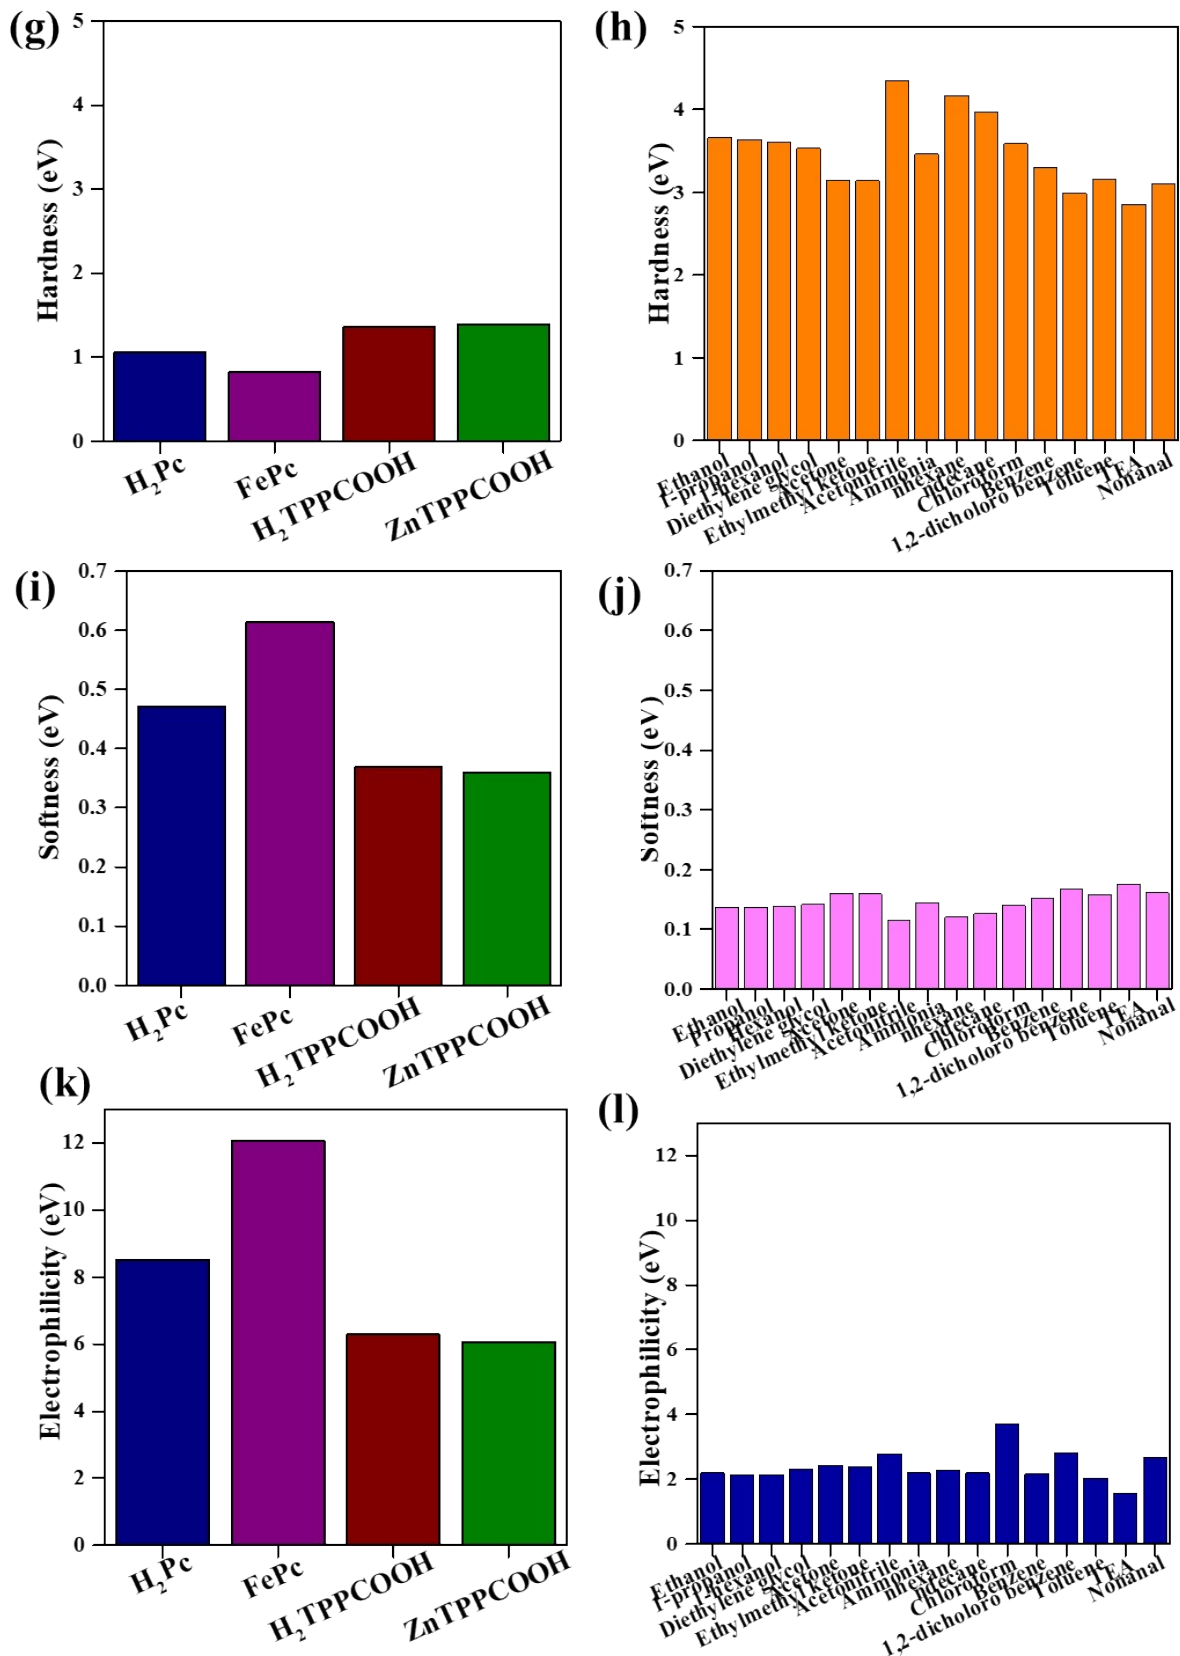

**Fig S2.** (a) HOMO-LUMO values of organic molecules, (b) HOMO-LUMO values of VOCs, (c) Electronegativity of organic molecules, (d) Electronegativity of VOCs, (e) Chemical potential of organic molecules, (f) Chemical potential of VOCs, (g) Hardness of organic

molecules, (h) Hardness of VOCs. (i) Softness of organic molecules, (j) softness of VOCs, (k) Electrophilicity of organic molecules, and (l) Electrophilicity of VOCs.

### Dipole moment and Mulliken charge analyses

**Table S1.** Dipole moment of organic molecules.

| Organic Molecule       | Dipole moment (Debye) |
|------------------------|-----------------------|
| H <sub>2</sub> Pc      | 0.000                 |
| FePc                   | 0.001                 |
| H <sub>2</sub> TPPCOOH | 6.256                 |
| ZnTPPCOOH              | 6.248                 |

Table S1 shows the dipole moment of pristine organic molecules. Phthalocyanines show zero dipole moment and porphyrins have a significant dipole moment due to the presence of the functional groups. The inclusion of the central metal atom in both phthalocyanines and porphyrins results in a negligible change in the dipole moment. The effect of VOCs adsorption on the dipole moment is investigated and is summarised in Table S2.

**Table S2.** Dipole moment (Debye) of organic molecules+VOCs systems.

| VOCs                | H <sub>2</sub> Pc | FePc | H <sub>2</sub> TPPCOOH | ZnTPPCOOH |
|---------------------|-------------------|------|------------------------|-----------|
| Ethanol             | 2.10              | 3.28 | 6.63                   | 8.13      |
| 1-propanol          | 2.00              | 3.37 | 7.05                   | 7.37      |
| 1-hexanol           | 2.05              | 3.67 | 6.41                   | 7.64      |
| Diethylene glycol   | 2.83              | 2.38 | 8.57                   | 7.73      |
| Acetone             | 2.76              | 4.77 | 6.63                   | 9.50      |
| Ethyl methyl ketone | 3.66              | 4.69 | 6.97                   | 8.13      |
| Acetonitrile        | 4.16              | 5.54 | 8.58                   | 10.00     |
| Ammonia             | 1.57              | 3.15 | 7.25                   | 7.84      |
| n-hexane            | 0.14              | 1.53 | 6.98                   | 6.23      |
| n-decane            | 0.17              | 1.57 | 6.18                   | 6.31      |
| Chloroform          | 2.31              | 0.76 | 9.27                   | 6.17      |
| Benzene             | 0.53              | 1.79 | 6.10                   | 6.15      |
| 1,2-dichlorobenzene | 3.56              | 1.79 | 3.28                   | 4.80      |
| Toluene             | 0.58              | 2.26 | 5.52                   | 6.33      |
| TEA                 | 0.46              | 1.55 | 7.30                   | 6.68      |
| Nonanal             | 2.44              | 4.61 | 6.55                   | 8.85      |

The change in dipole moment observed during adsorption is due to charge transfer between organic molecules and VOCs.[1] In all the cases, organic molecules with acetonitrile

have the highest dipole moment. The adsorption of acetonitrile on ZnTPPCOOH has the highest dipole (10 Debye) moment whereas the adsorption of n-hexane on H<sub>2</sub>Pc has the lowest dipole moment (0.14 Debye). It can be concluded that porphyrin systems have the highest dipole moment than phthalocyanines. Mulliken charge analysis illustrates this point. It determines the partial atomic charges of molecules in a system.[2] Charge transfer from organic molecules to VOCs can be seen in this Table S3. Charge transfer mechanism such as physisorption (low charge transfer) and chemisorption (high charge transfer) were used to confirm the magnitude of gas interaction.[3] In all circumstances, organic molecules with metal ions exhibit a greater ability to transfer charge. As a result, metal-organic molecules exhibit higher charge transfer than metal-free organic molecules.

**Table S3.** Mulliken charge (e) on organic molecules after adsorption of VOCs.

| VOCs                | H <sub>2</sub> Pc | FePc  | H <sub>2</sub> TPPCOOH | ZnTPPCOOH |
|---------------------|-------------------|-------|------------------------|-----------|
| Ethanol             | -0.02             | -0.48 | -0.02                  | -0.21     |
| 1-propanol          | -0.03             | -0.55 | -0.02                  | -0.15     |
| 1-hexanol           | 0.09              | -0.31 | -0.01                  | -0.03     |
| Diethyl glycol      | 0.01              | -0.39 | 0.02                   | -0.15     |
| Acetone             | 0.02              | -0.55 | -0.02                  | -0.20     |
| Ethyl methyl ketone | 0.07              | -0.52 | -0.02                  | -0.19     |
| Acetonitrile        | 0.08              | -0.59 | 0.00                   | -0.34     |
| Ammonia             | 0.01              | -0.58 | 0.03                   | -0.33     |
| n-hexane            | 0.12              | -0.27 | -0.03                  | 0.06      |
| n-decane            | 0.07              | -0.24 | -0.02                  | 0.08      |
| Chloroform          | 0.07              | -0.48 | 0.01                   | 0.00      |
| Benzene             | 0.03              | -0.24 | 0.09                   | -0.03     |
| 1,2-dichlorobenzene | 0.06              | -0.41 | -0.08                  | 0.07      |
| Toluene             | 0.07              | -0.20 | 0.09                   | -0.03     |
| TEA                 | 0.08              | -0.15 | -0.04                  | 0.11      |
| Nonanal             | 0.11              | -0.51 | 0.03                   | 0.14      |

**Table S4.** Sensitivity of organic molecules toward VOCs.

| VOCs       | H <sub>2</sub> Pc | FePc   | H <sub>2</sub> TPPCOOH | ZnTPPCOOH |
|------------|-------------------|--------|------------------------|-----------|
| Ethanol    | 56.04             | 100.00 | 22.83                  | 471.21    |
| 1-propanol | 56.04             | 100.00 | 9.46                   | 489.65    |
| 1-hexanol  | 50.36             | 100.00 | 17.33                  | 324.60    |

|                     |       |        |        |        |
|---------------------|-------|--------|--------|--------|
| Diethylene glycol   | 59.38 | 100.00 | 26.96  | 403.02 |
| Acetone             | 24.91 | 100.00 | 19.49  | 433.20 |
| Ethyl methyl ketone | 11.17 | 100.00 | 100.00 | 525.03 |
| Acetonitrile        | 26.24 | 100.00 | 23.24  | 531.68 |
| Ammonia             | 22.95 | 100.00 | 14.66  | 689.06 |
| n-hexane            | 0.00  | 100.00 | 0.50   | 23.60  |
| n-decane            | 0.53  | 100.00 | 4.12   | 34.53  |
| Chloroform          | 26.24 | 100.00 | 21.69  | 23.60  |
| Benzene             | 2.68  | 100.00 | 12.84  | 10.59  |
| 1,2-dichlorobenzene | 7.70  | 100.00 | 2.06   | 36.68  |
| Toluene             | 6.00  | 100.00 | 10.97  | 14.16  |
| TEA                 | 0.00  | 100.00 | 515.37 | 15.99  |
| Nonanal             | 26.91 | 100.00 | 19.07  | 5.66   |

**Table S5.** Selectivity of organic molecules toward VOCs.

| VOCs                | H <sub>2</sub> Pc | FePc  | H <sub>2</sub> TPPCOOH | ZnTPPCOOH |
|---------------------|-------------------|-------|------------------------|-----------|
| Ethanol             | 0.149             | 0.063 | 0.028                  | 0.117     |
| 1-propanol          | 0.149             | 0.063 | 0.012                  | 0.121     |
| 1-hexanol           | 0.134             | 0.063 | 0.021                  | 0.081     |
| Diethylene glycol   | 0.157             | 0.063 | 0.033                  | 0.100     |
| Acetone             | 0.066             | 0.063 | 0.024                  | 0.107     |
| Ethyl methyl ketone | 0.030             | 0.063 | 0.122                  | 0.130     |
| Acetonitrile        | 0.070             | 0.063 | 0.028                  | 0.132     |
| Ammonia             | 0.061             | 0.063 | 0.018                  | 0.171     |
| n-hexane            | 0.000             | 0.063 | 0.001                  | 0.006     |
| n-decane            | 0.001             | 0.063 | 0.005                  | 0.009     |
| Chloroform          | 0.070             | 0.063 | 0.026                  | 0.006     |
| Benzene             | 0.007             | 0.063 | 0.016                  | 0.003     |
| 1,2-dichlorobenzene | 0.020             | 0.063 | 0.003                  | 0.009     |
| Toluene             | 0.016             | 0.063 | 0.013                  | 0.004     |

|         |       |       |       |       |
|---------|-------|-------|-------|-------|
| TEA     | 0.000 | 0.063 | 0.628 | 0.004 |
| Nonanal | 0.071 | 0.063 | 0.023 | 0.001 |

**Table S6.** Recovery time (sec) of VOCs on each organic molecule at room temperature 298K.

| VOCs                  | H <sub>2</sub> Pc | FePc     | H <sub>2</sub> TPPCOOH | ZnTPPCOOH |
|-----------------------|-------------------|----------|------------------------|-----------|
| Ethanol               | 9.71E-09          | 2.02E+04 | 6.46E-07               | 1.39E-06  |
| 1-propanol            | 7.81E-09          | 4.34E+03 | 9.87E-10               | 1.54E-06  |
| 1-hexanol             | 3.54E-09          | 3.00E+04 | 7.05E-07               | 1.38E-06  |
| Diethylene glycol     | 1.55E-08          | 2.54E+03 | 1.73E-08               | 6.43E-07  |
| Acetone               | 1.44E-11          | 2.71E+03 | 1.69E-06               | 1.27E-07  |
| Ethylmethyl ketone    | 5.26E-12          | 4.74E+03 | 3.02E-07               | 1.35E-07  |
| Acetonitrile          | 2.58E-11          | 2.73E+08 | 7.07E-08               | 2.00E-08  |
| Ammonia               | 4.31E-11          | 1.16E+12 | 1.32E-05               | 3.21E-04  |
| n-hexane              | 1.80E-12          | 4.12E-10 | 2.38E-12               | 1.73E-12  |
| n-decane              | 1.26E-12          | 4.43E-10 | 1.47E-12               | 1.97E-12  |
| Chloroform            | 1.16E-10          | 1.00E-05 | 3.48E-09               | 3.01E-10  |
| Benzene               | 2.94E-12          | 2.10E-09 | 7.81E-11               | 3.75E-12  |
| 1,2-dicholoro benzene | 8.34E-12          | 6.72E-06 | 1.19E-10               | 3.32E-11  |
| Toluene               | 2.44E-12          | 8.41E-09 | 1.61E-10               | 3.47E-12  |
| TEA                   | 1.48E-12          | 3.50E-10 | 4.52E-12               | 1.95E-12  |
| Nonanal               | 1.92E-11          | 8.47E+04 | 4.21E-07               | 8.06E-11  |

**Table S7.** Recovery time (sec) of VOCs on each organic molecule at a high temperature of 498K.

| VOCs       | H <sub>2</sub> Pc | FePc     | H <sub>2</sub> TPPCOOH | ZnTPPCOOH |
|------------|-------------------|----------|------------------------|-----------|
| Ethanol    | 2.43E-10          | 5.72E-03 | 3.00E-09               | 4.75E-09  |
| 1-propanol | 2.14E-10          | 2.28E-03 | 6.19E-11               | 5.03E-09  |
| 1-hexanol  | 1.33E-10          | 7.24E-03 | 3.16E-09               | 4.72E-09  |



|                       |          |          |          |          |
|-----------------------|----------|----------|----------|----------|
| Diethylene glycol     | 3.22E-10 | 1.65E-03 | 3.44E-10 | 2.99E-09 |
| Acetone               | 4.93E-12 | 1.72E-03 | 5.33E-09 | 1.13E-09 |
| Ethylmethyl ketone    | 2.70E-12 | 2.40E-03 | 1.90E-09 | 1.18E-09 |
| Acetonitrile          | 7.00E-12 | 1.69E+00 | 7.98E-10 | 3.74E-10 |
| Ammonia               | 9.50E-12 | 2.52E+02 | 1.83E-08 | 1.23E-07 |
| n-hexane              | 1.42E-12 | 3.67E-11 | 1.68E-12 | 1.39E-12 |
| n-decane              | 1.15E-12 | 3.83E-11 | 1.26E-12 | 1.50E-12 |
| Chloroform            | 1.72E-11 | 1.55E-08 | 1.32E-10 | 3.04E-11 |
| Benzene               | 1.91E-12 | 9.72E-11 | 1.36E-11 | 2.21E-12 |
| 1,2-dicholoro benzene | 3.56E-12 | 1.22E-08 | 1.75E-11 | 8.13E-12 |
| Toluene               | 1.70E-12 | 2.23E-10 | 2.09E-11 | 2.10E-12 |
| TEA                   | 1.27E-12 | 3.33E-11 | 2.47E-12 | 1.49E-12 |
| Nonanal               | 5.85E-12 | 1.35E-02 | 2.32E-09 | 1.38E-11 |

## References

- [1] S. Hussain, S.A. Shahid Chatha, A.I. Hussain, R. Hussain, M.Y. Mehboob, T. Gulzar, A. Mansha, N. Shahzad, K. Ayub, Designing Novel Zn-Decorated Inorganic B12P12Nanoclusters with Promising Electronic Properties: A Step Forward toward Efficient CO2Sensing Materials, ACS Omega. 5 (2020) 15547–15556. <https://doi.org/10.1021/acsomega.0c01686>.
- [2] R. Sarkar, T.K. Kundu, Density functional theory studies on PVDF/ionic liquid composite systems, J. Chem. Sci. 130 (2018). <https://doi.org/10.1007/s12039-018-1522-4>.
- [3] Z. Zhao, Y. Yong, Q. Zhou, Y. Kuang, X. Li, Gas-Sensing Properties of the SiC Monolayer and Bilayer: A Density Functional Theory Study, ACS Omega. 5 (2020) 12364–12373. <https://doi.org/10.1021/acsomega.0c01084>.
